# Supplementary material for: Conflict Hotspot Trajectories in Somalia from 2015-2023: Descriptive Spatial Diagnostics to Inform Measles Program Monitoring
Source: Research Square preprint supplement (doi:10.21203/rs.3.rs-7235155/v2), 2025-09-24
Supplement: Supplementary file 1 [file e8e1d0faee9eec402a65b860.pdf]

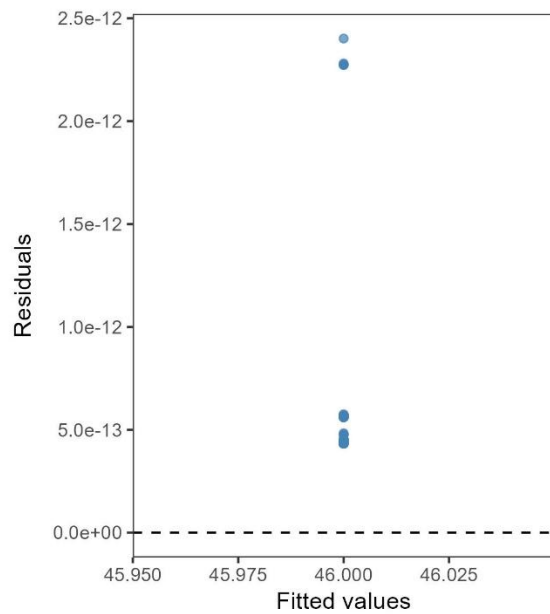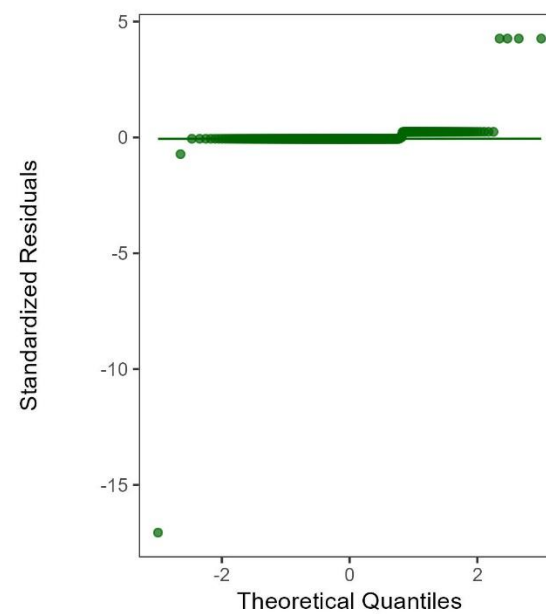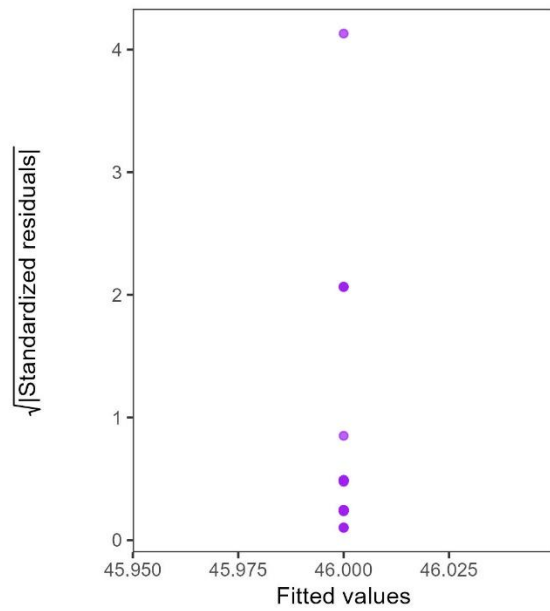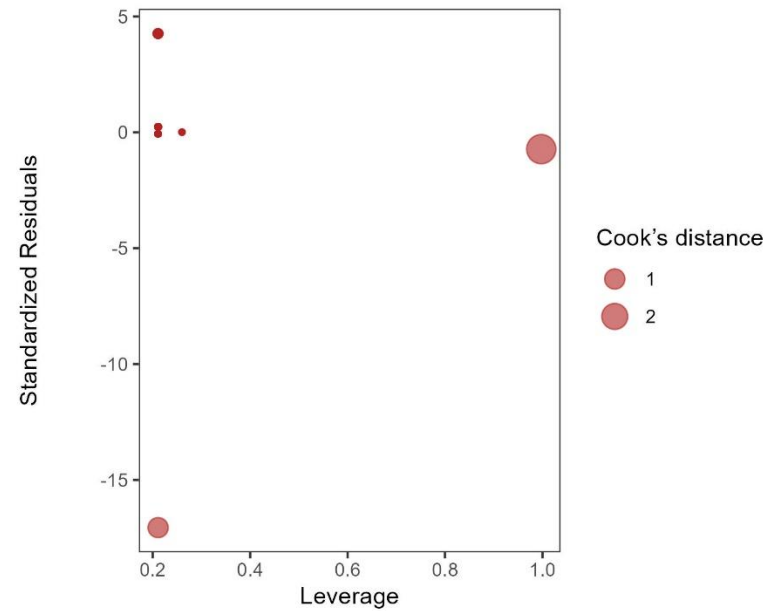

Fig. S1 Diagnostic plots for the annual hotspot regression model (model\_ann).

**Note:** Residuals vs. fitted values (top-left) assesses homoscedasticity; normal Q-Q plot (top-right) evaluates residual normality; scale-location plot (bottom-left) examines the spread of residuals; residuals vs. leverage plot (bottom-right) identifies influential observations (point size  $\propto$  Cook's distance). All diagnostics support the adequacy of the OLS model (model\_ann).
